# Supplementary material for: Selecting appropriate cellulose morphology to enhance the nitrogen content of nitrocellulose
Source: Royal Society of Chemistry journal article supplement (doi:10.1039/d4ra04172k), 2024-01-01

Electronic Supplementary Material (ESI) for RSC Advances

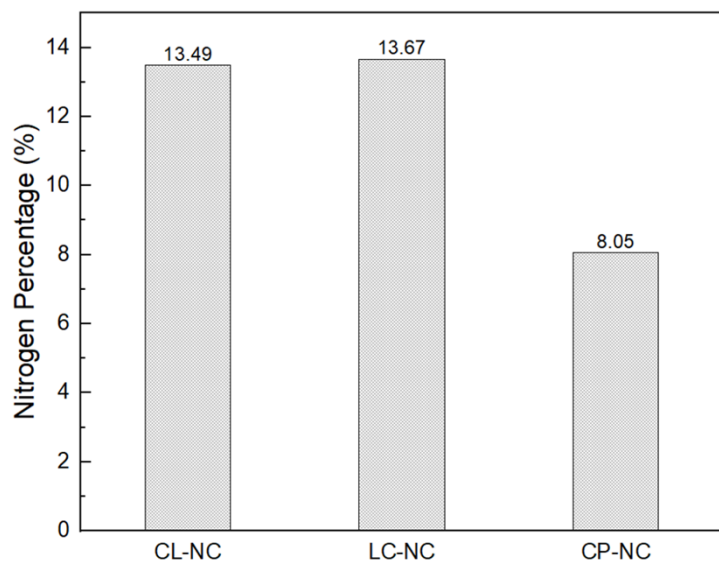

Nitrogen content of CL-NC, LC-NC, and CP-NC

Diffraction angle and  $d_{hkl}$  of pre and post-nitrated celluloses

| Sample           | $2\theta$ (1 0 1) | $\theta$ (1 0 1) | $d_{hkl}$ (Å) |
|------------------|-------------------|------------------|---------------|
| CL               | 15.07             | 7.54             | 5.87          |
| LCC              | 14.68             | 7.34             | 6.03          |
| CPC              | 15.70             | 7.85             | 5.64          |
| CL-NC (13.49% N) | 12.66             | 6.33             | 6.99          |
| LC-NC (13.67% N) | 12.42             | 6.21             | 7.12          |
| CP-NC (8.05% N)  | 15.66             | 7.83             | 5.65          |

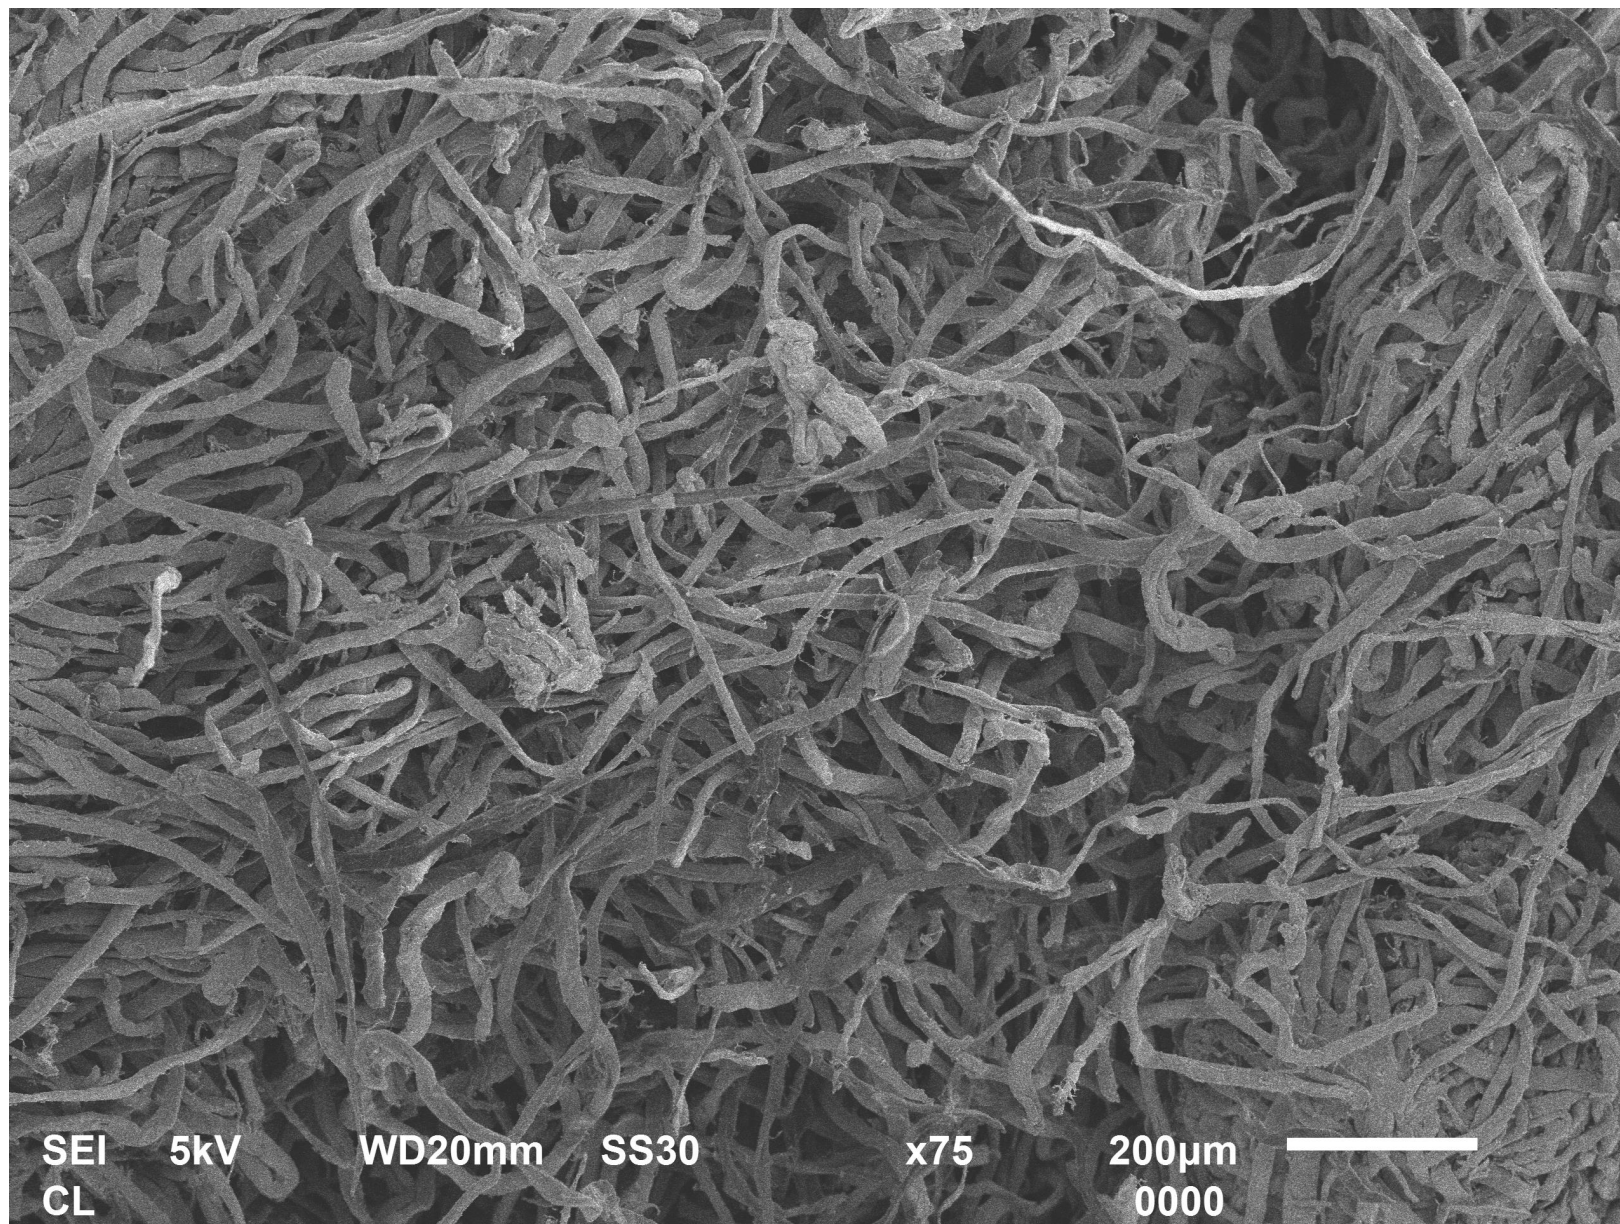

SEM Photomicrograph of Cotton Linter 75x Magnification

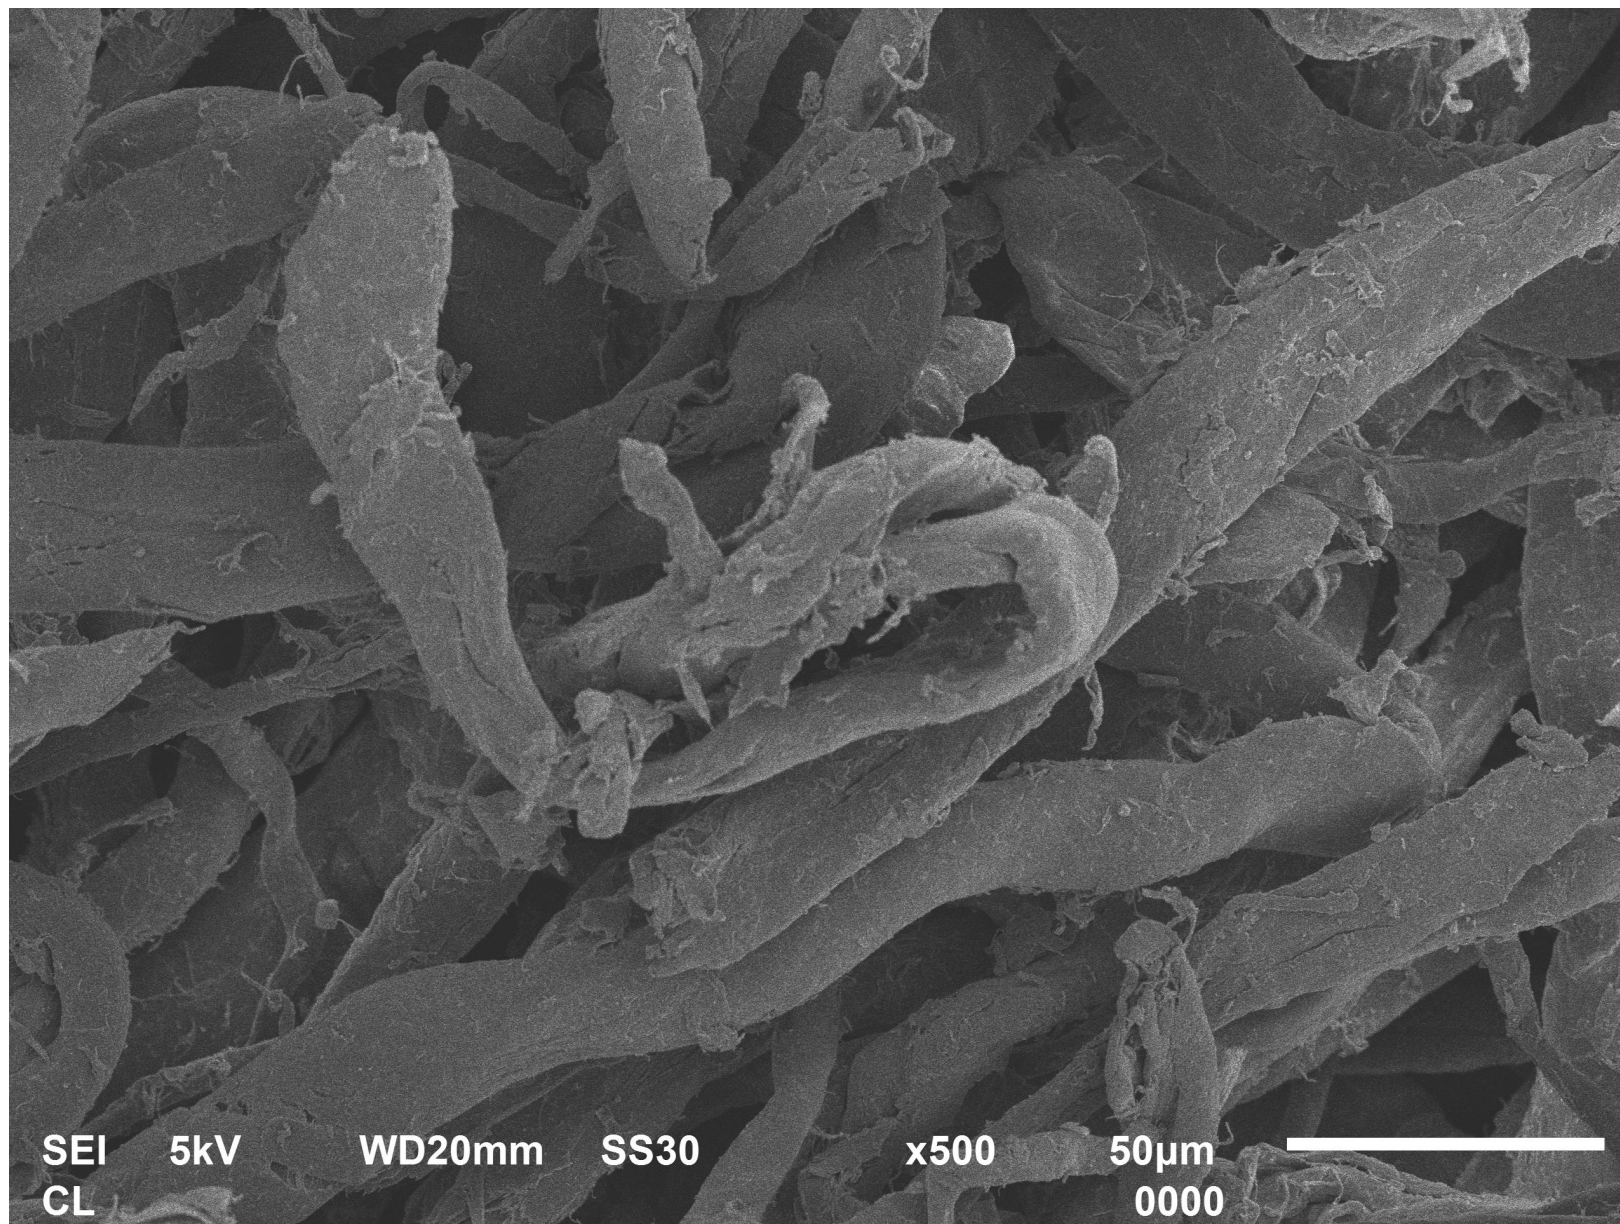

SEM Photomicrograph of Cotton Linter 500x Magnification



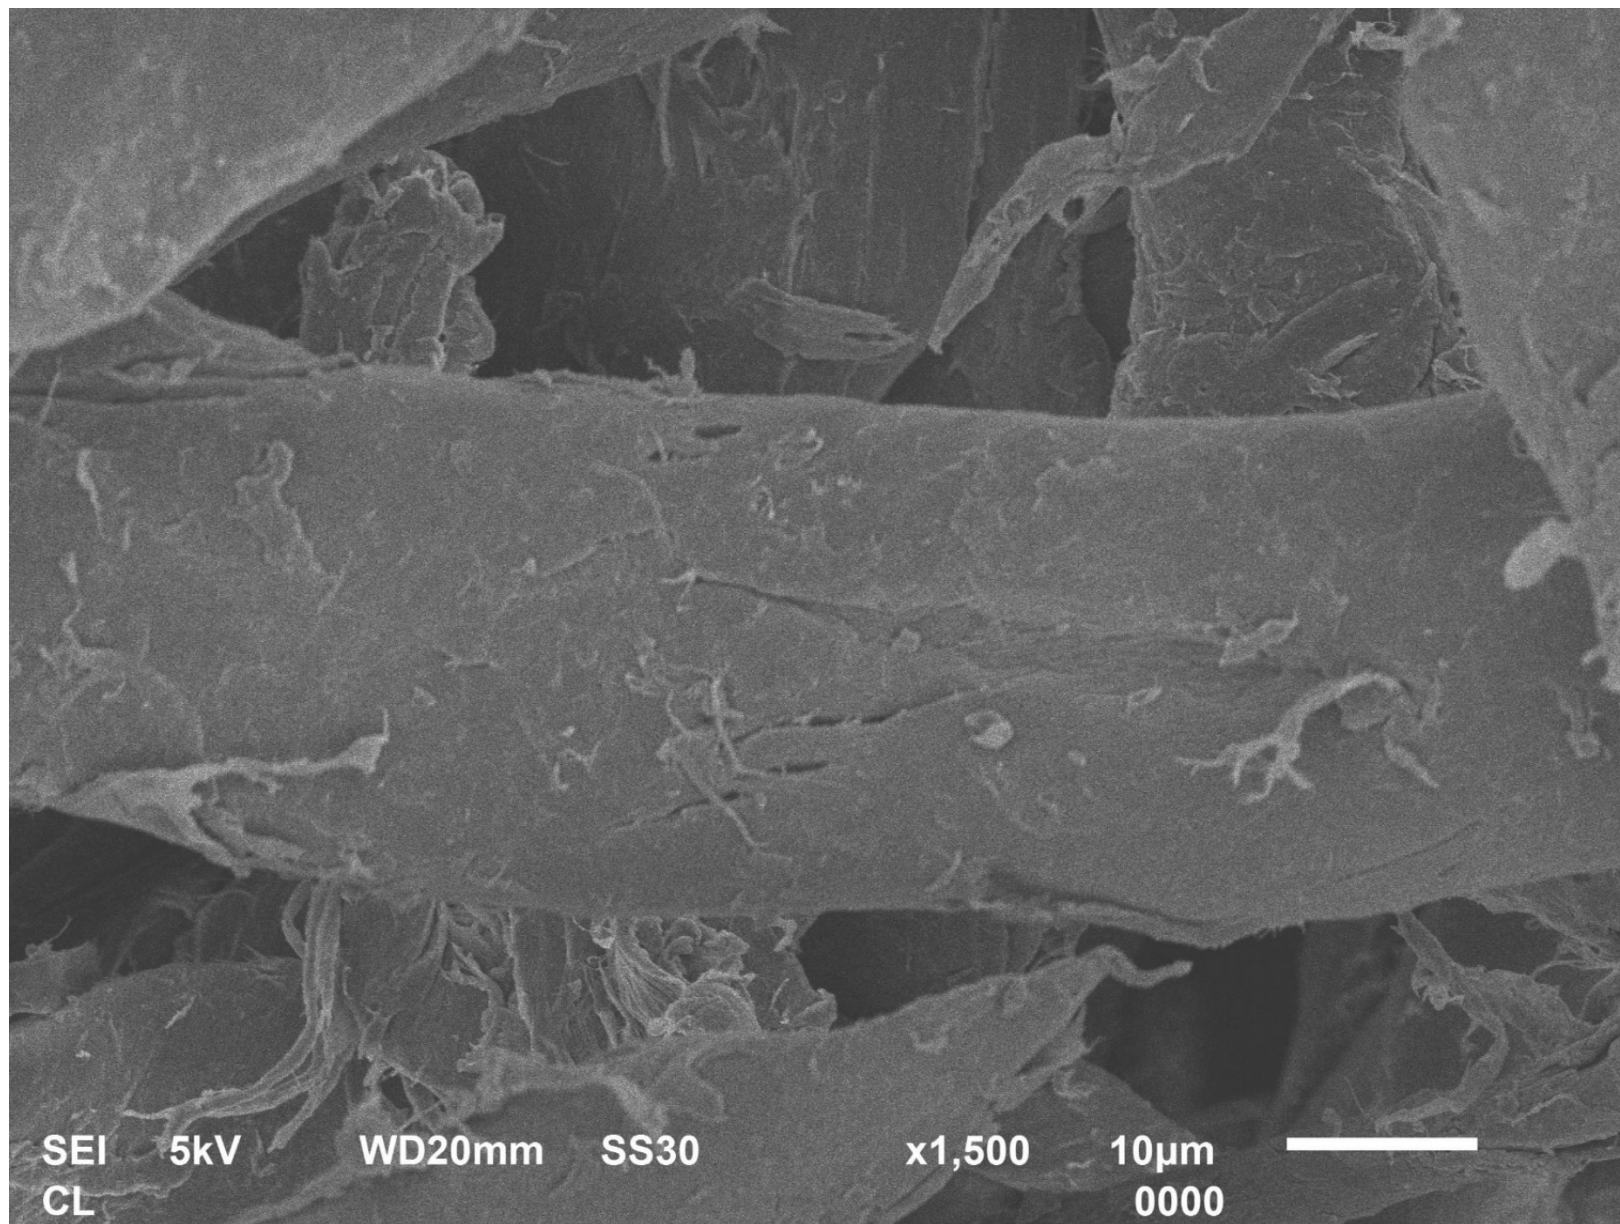

SEM Photomicrograph of Cotton Linter 1500x Magnification

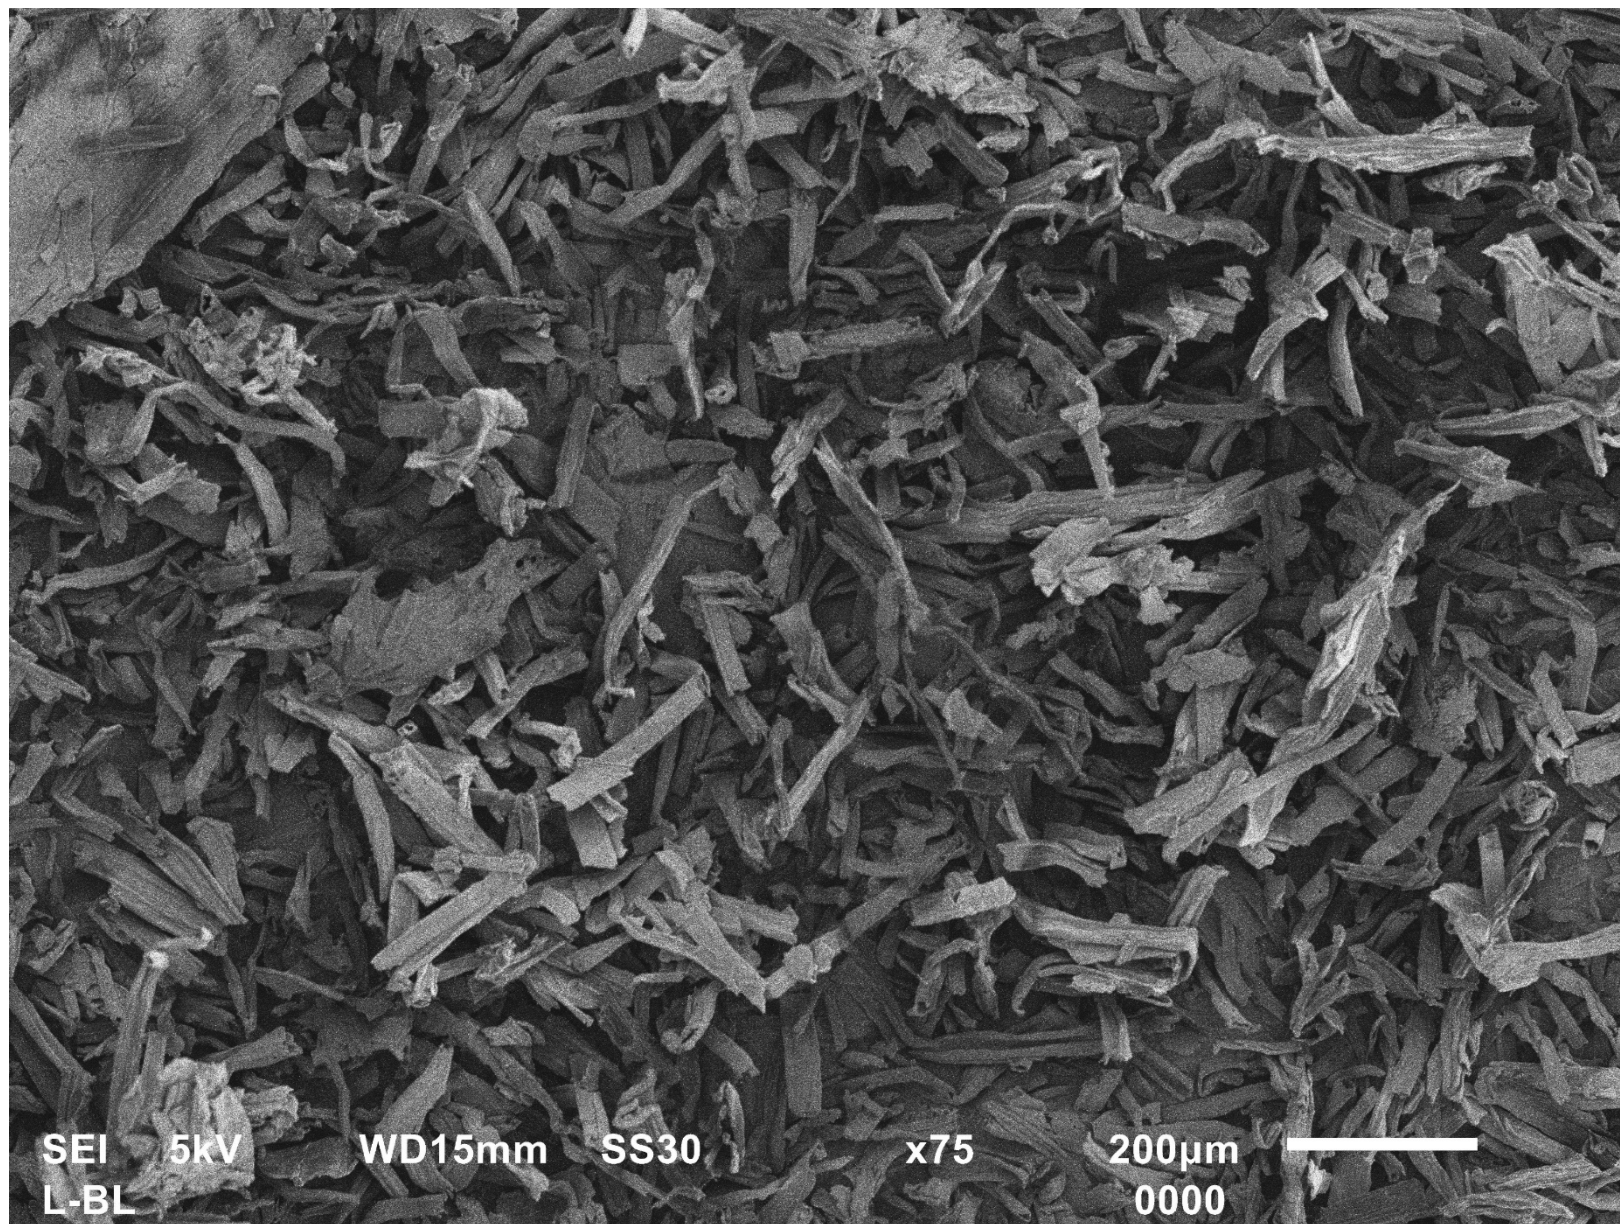

SEM Photomicrograph of Luffa Cylindrica Cellulose 75x Magnification

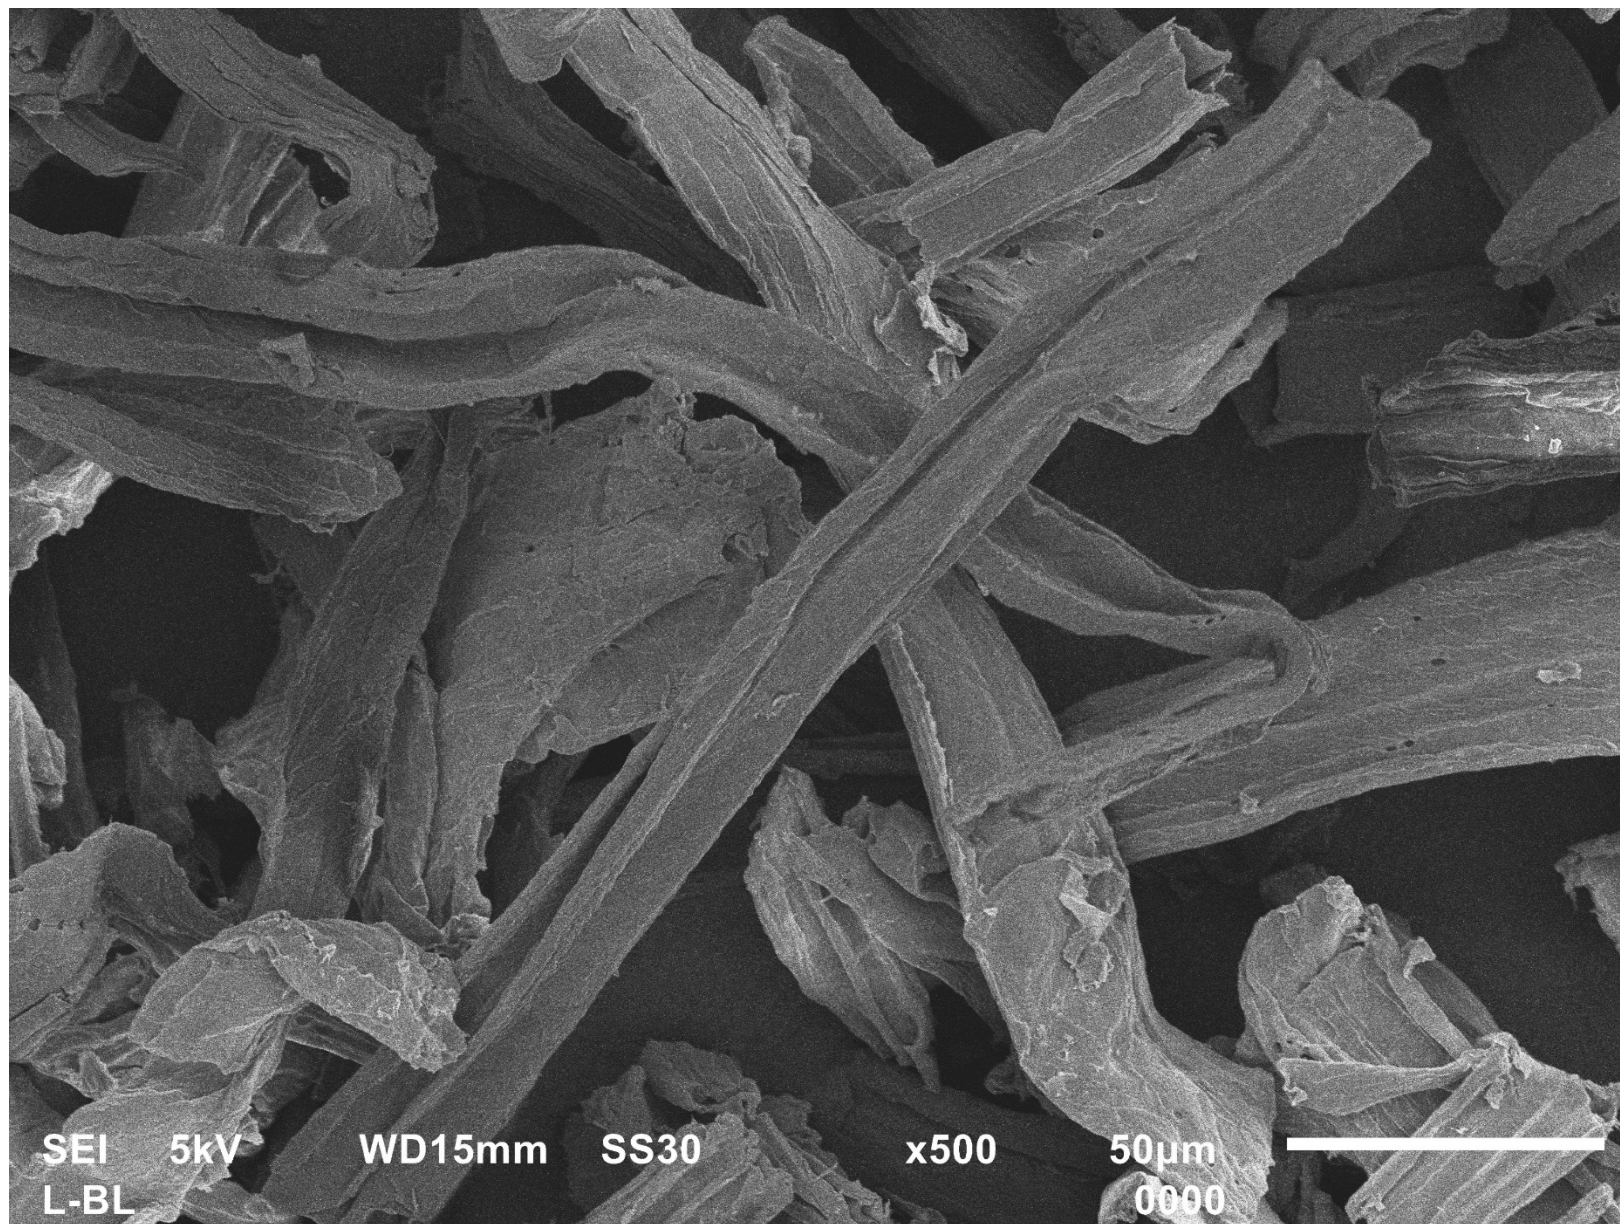

SEM Photomicrograph of Luffa Cylindrica Cellulose 500x Magnification



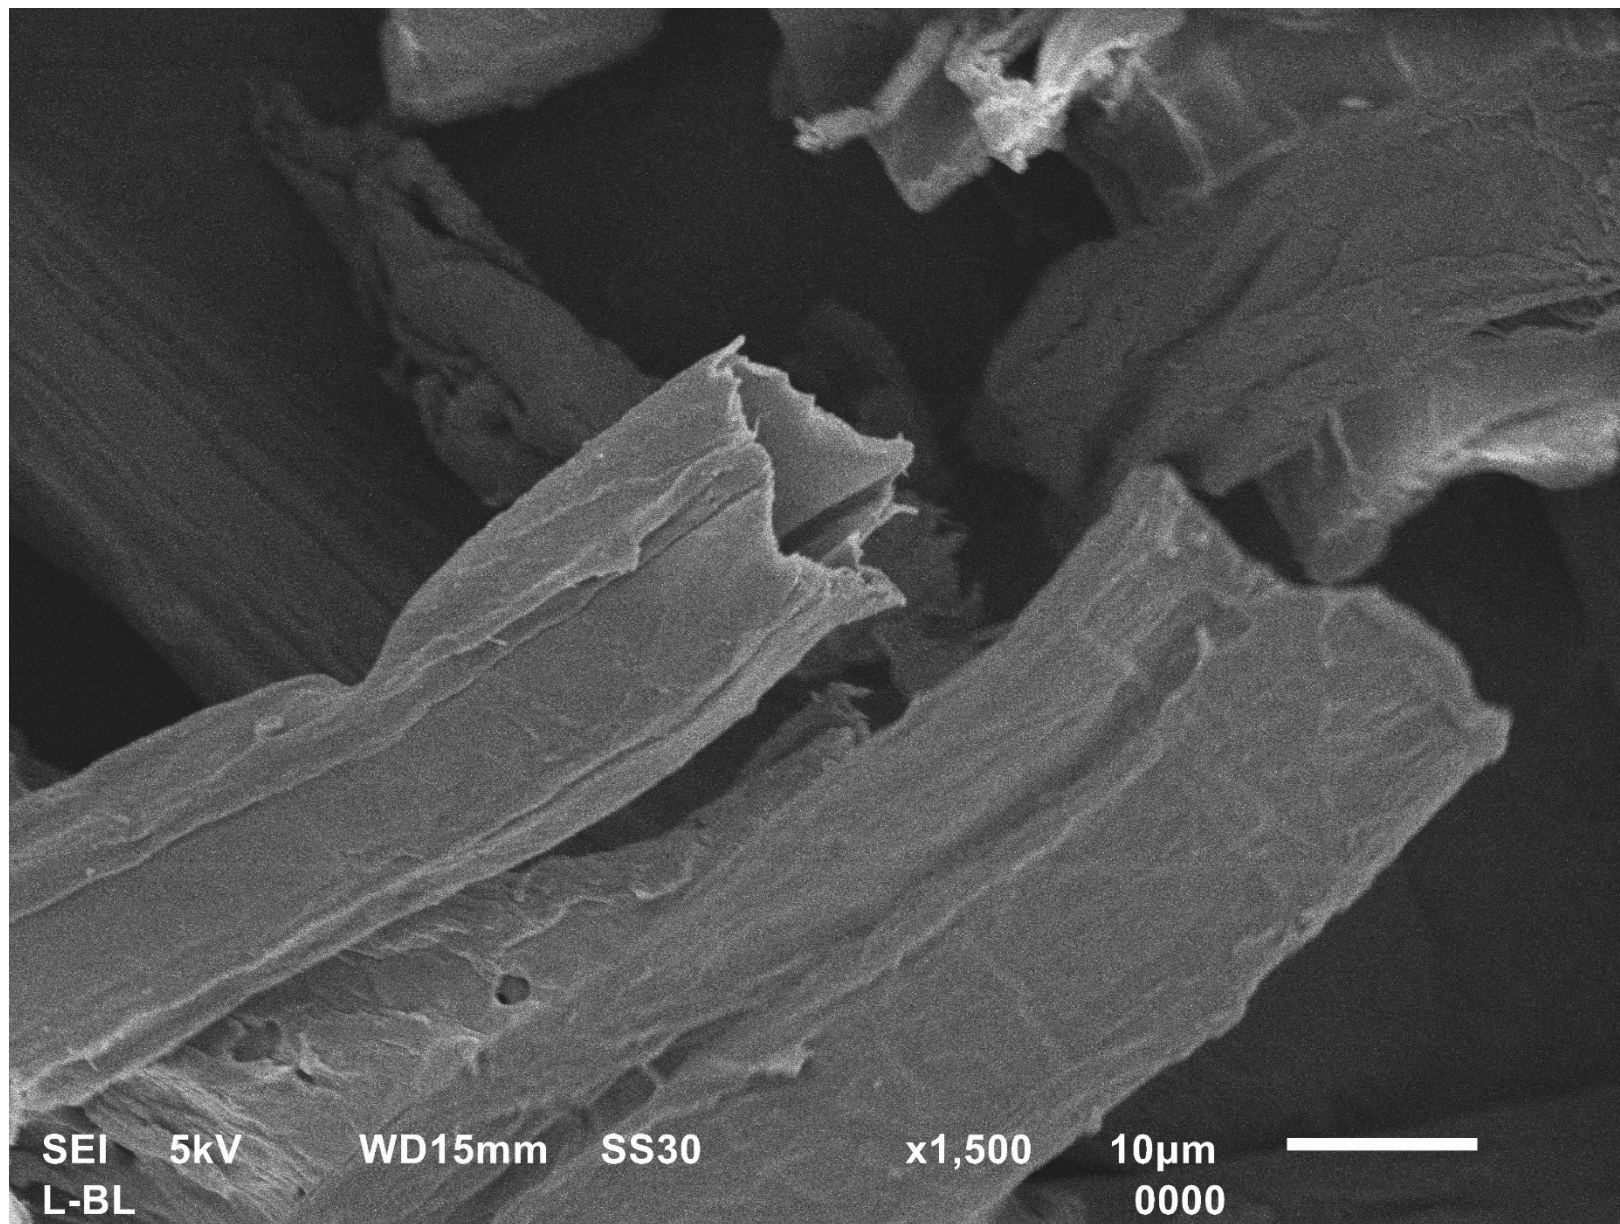

SEM Photomicrograph of Luffa Cylindrica Cellulose 1500x Magnification

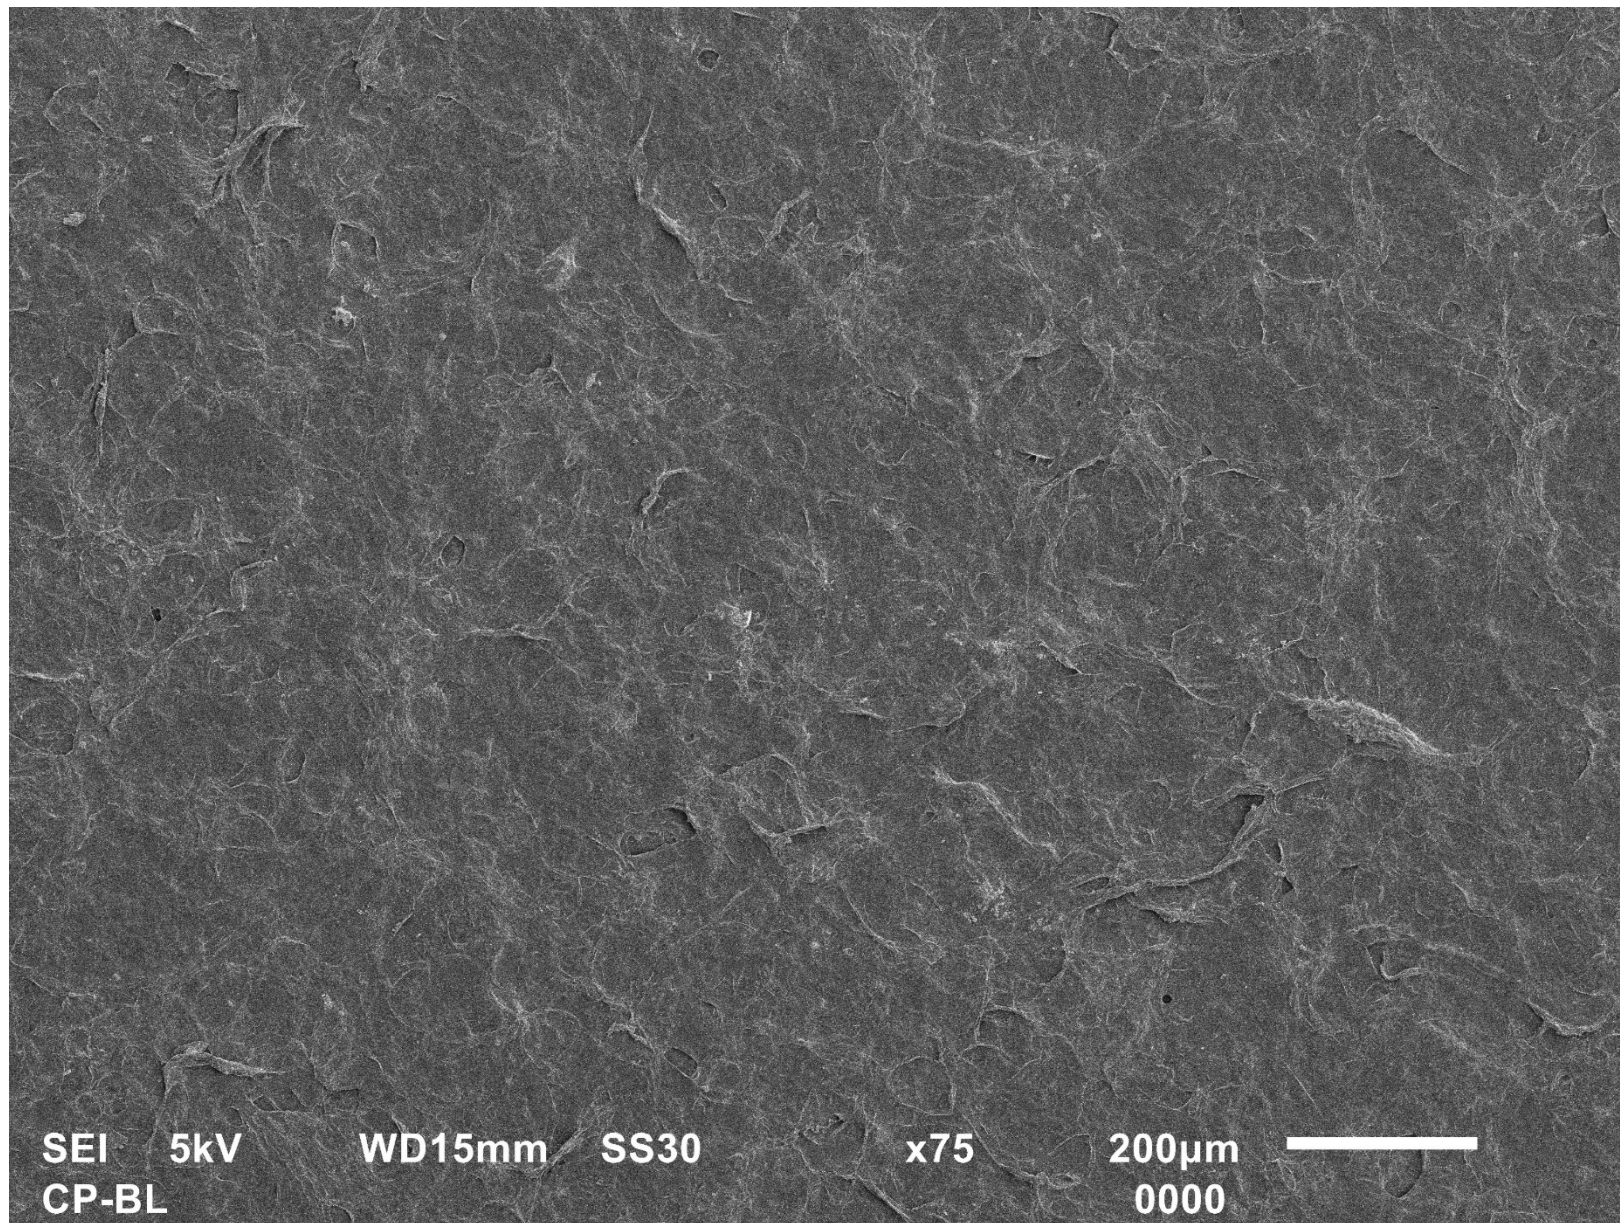

SEM Photomicrograph of Arabica Coffee Pulp Cellulose 75x Magnification



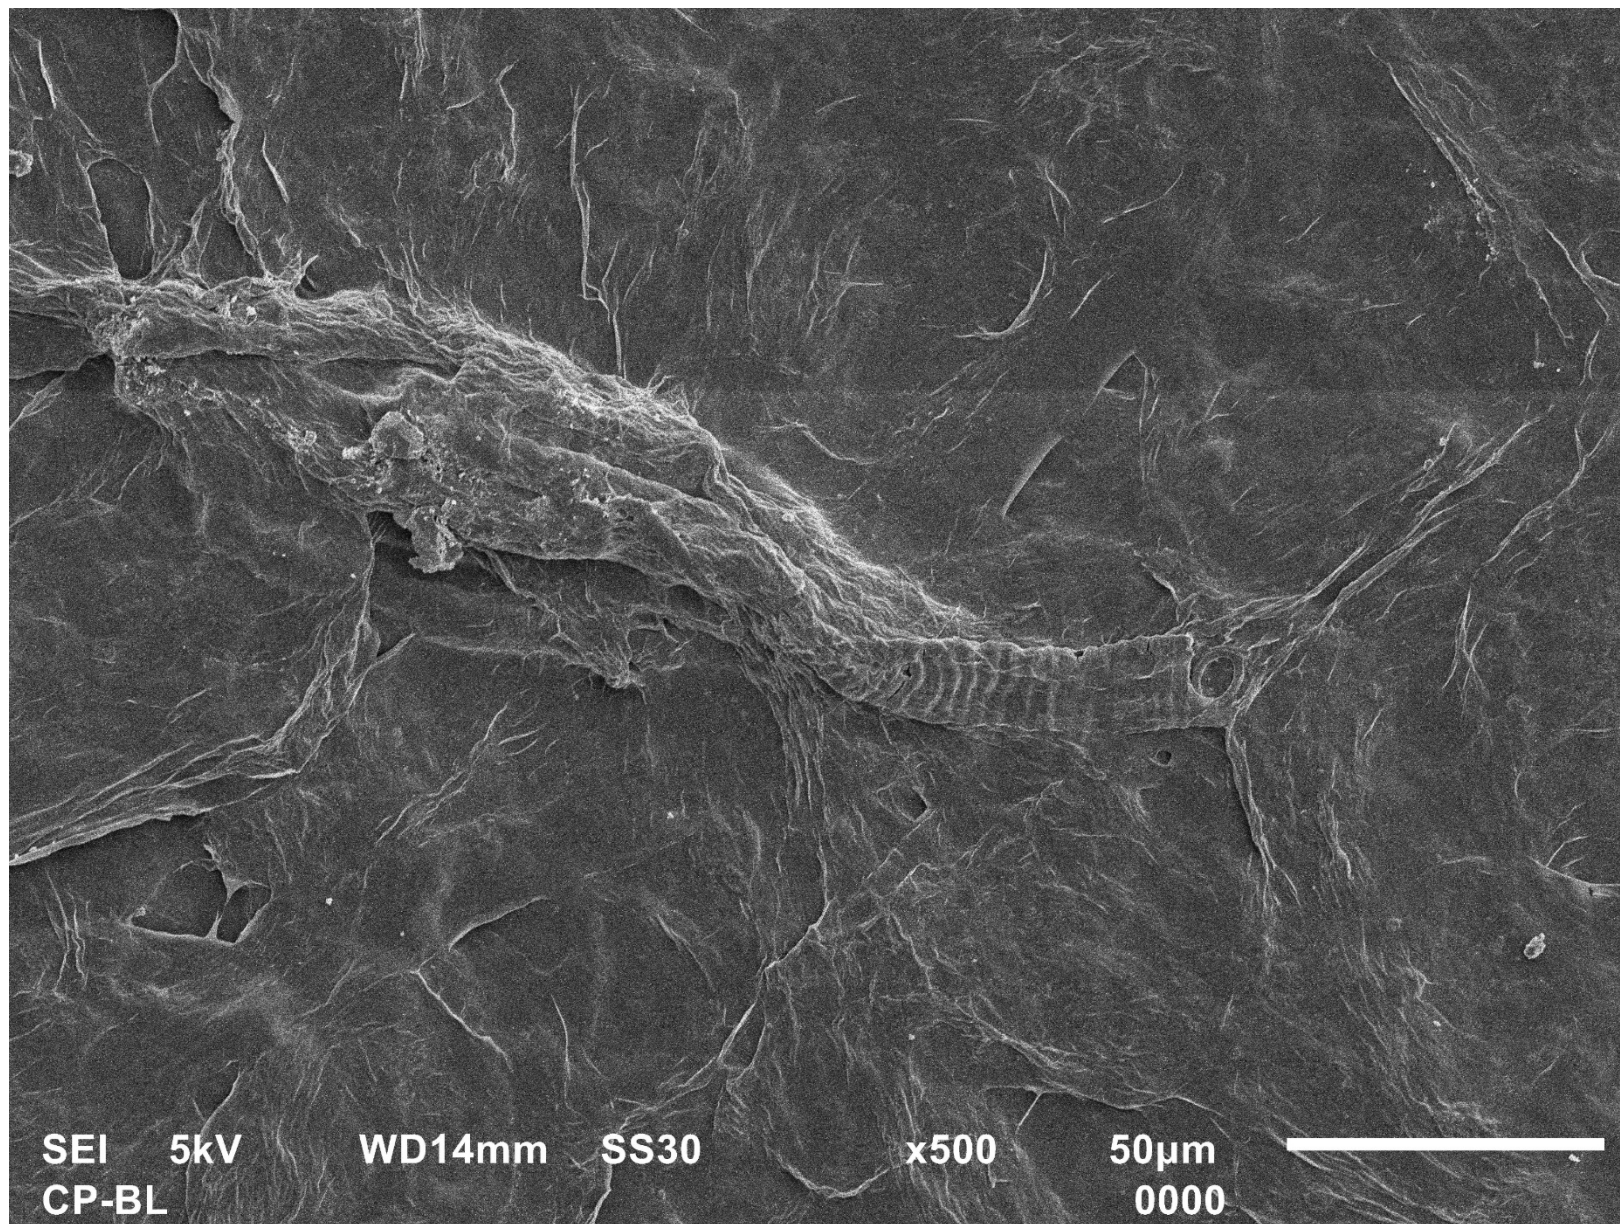

SEM Photomicrograph of Arabica Coffee Pulp Cellulose 500x Magnification

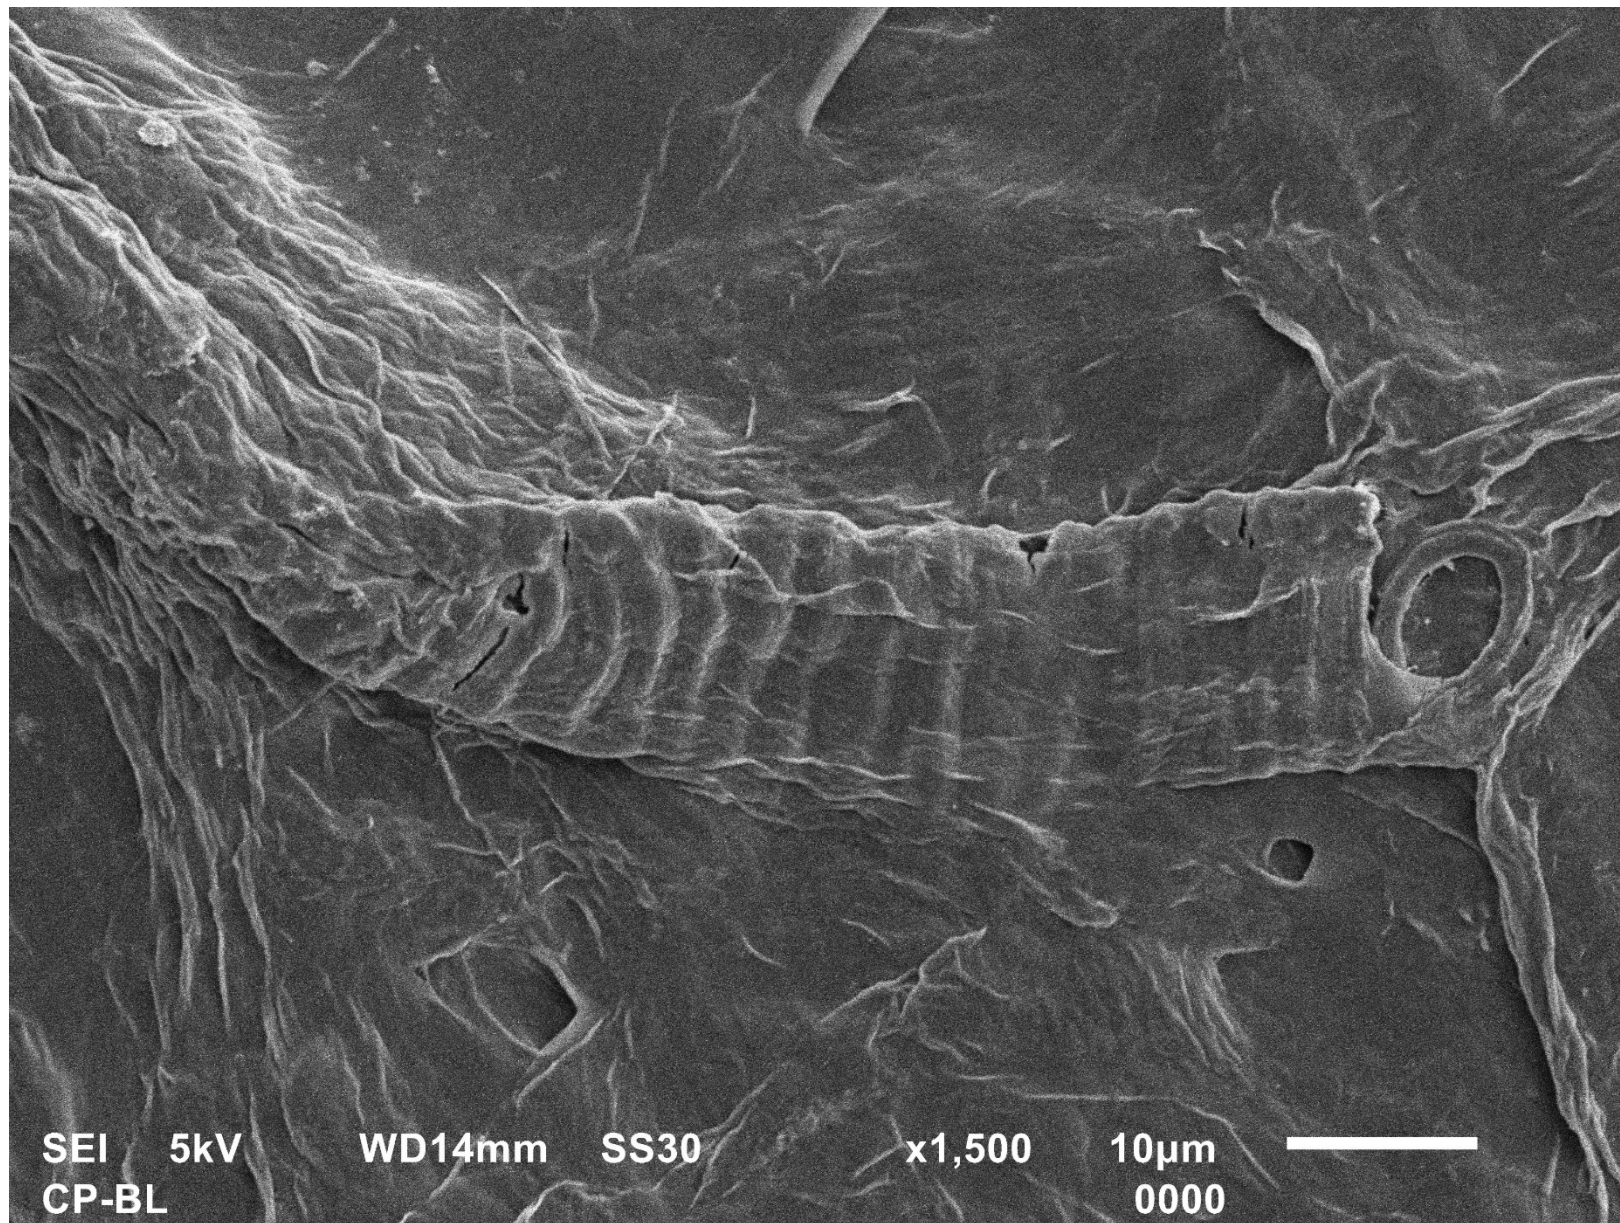

Supplement: d4ra04172k1.pdf [file d4ra04172k1.pdf]
